# Supplementary material for: Improving photocatalytic hydrogen production by switching charge kinetics from type-I to Z-scheme via defective engineering
Source: Royal Society of Chemistry journal article supplement (doi:10.1039/d3dt03043a), 2023-01-01
Supplement: d3dt03043a1.pdf [file d3dt03043a1.pdf]

## SUPPORTING INFORMATION

---

### *Supporting Information*

# **Improving Photocatalytic Hydrogen Production through Switching Charge Kinetics from Type-I to Z-scheme via Defective Engineering**

Shuang Wang, Mengjie Yao, Yuye Cheng, Kai Ding, Minghao Dou, Hongyu Shao, Shuaitong Xue, Shenjie Li\* and Yanyan Chen\*

School of Chemistry and Chemical Engineering, Hefei University of Technology, Hefei, Anhui, 230009, People's Republic of China.

\*Corresponding Author Email: [yanyanchen@hfut.edu.cn](mailto:yanyanchen@hfut.edu.cn); [shenjieli@hfut.edu.cn](mailto:shenjieli@hfut.edu.cn);

**Number of pages: 14**

**Number of figures: 9**

**Number of tables: 2**

**Number of schemes: 0**

### Table of Contents

**Figure S1.** The XRD patterns of NiS.

**Figure S2.** The elemental mapping images EDX (a-f) of CZNS 6.

**Figure S3.** XRD patterns (a) and high-resolution XPS spectra of Ni 2p (b) for CZNS 6 before and after the photocatalytic hydrogen evolution reaction.

**Figure S4.** The Tauc plots of NiS, CZS and CZNS 6 (a); the Mott–Schottky plots of NiS (b).

**Figure S5.** The Tauc plots of ZnS (a) and enlarged view for ZnS at visible region local(b); the Mott–Schottky plots of ZnS(c).

**Figure S6.** The photo-current curves (a) and Electrochemical Impedence Spectroscopy (EIS) (b) of CZS, NiS, and CZNS 6.

**Figure S7.** The Photo-Current curves (a) and Electrochemical Impedence Spectroscopy (EIS) (b) of samples with different NiS additions.

**Figure S8.** The band structure and charge transfer mechanism of sample CZS under visible light (> 420 nm): (a) Z-Scheme; (b) type-II.

**Figure S9.** The UPS spectra of samples NiS, CZS and CZNS 6(a), and the corresponding photo-emission cutoff spectra of NiS (b) and CZS (c) .

**Table S1.** The time-resolved photoluminescence of sample CZN and CZNS 6.

**Table S2.** Recent heterojunction photocatalytic systems for H<sub>2</sub> evolution based on the Zn-Cd-S nanomaterials.

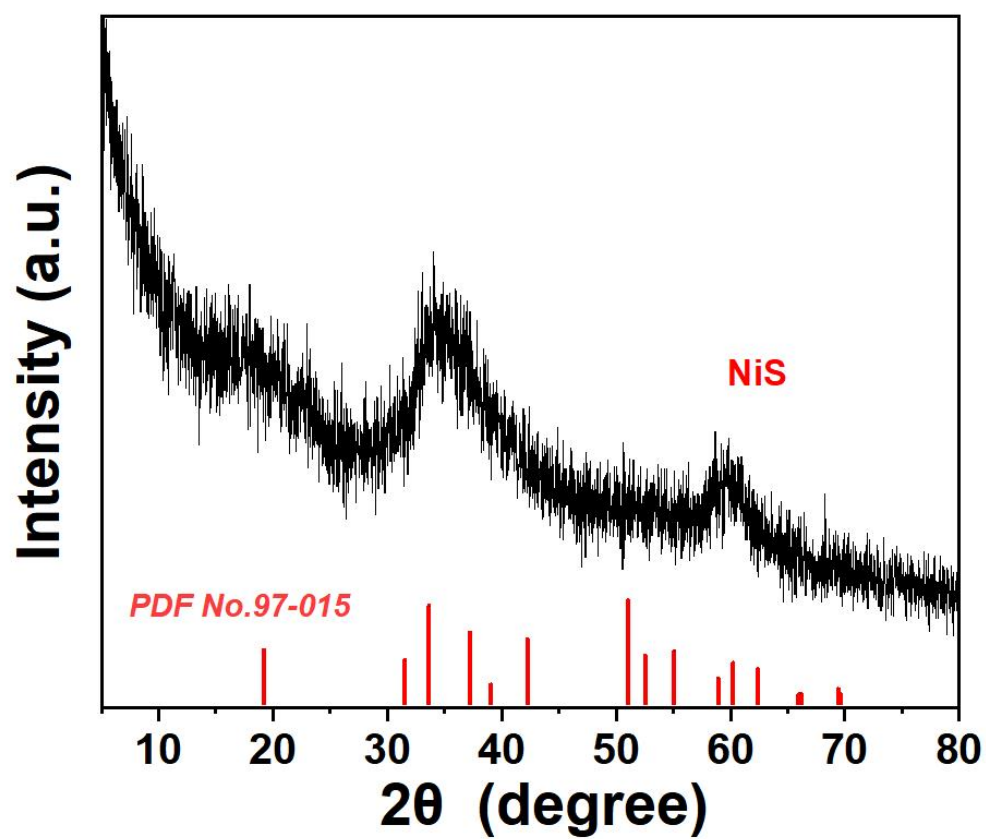

**Figure S1.** The XRD patterns of NiS.

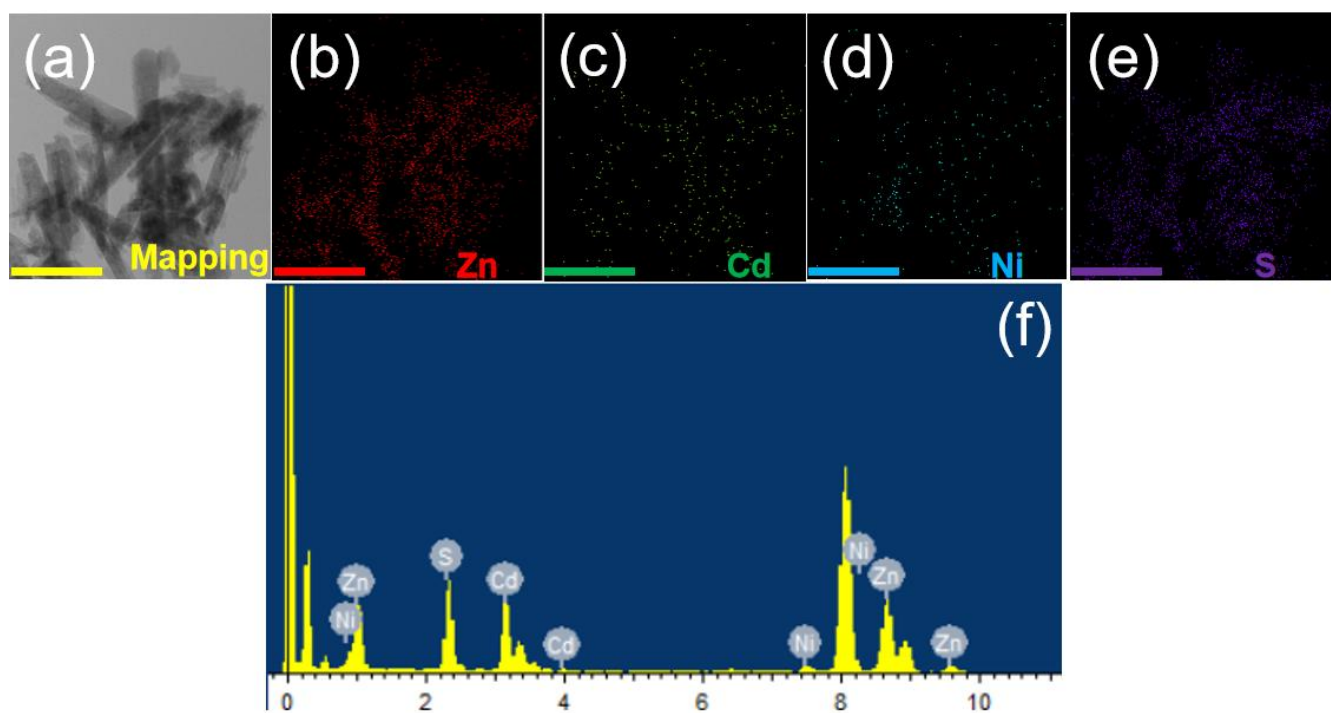

**Figure S2.** The elemental mapping images EDX (a-f) of CZNS 6.

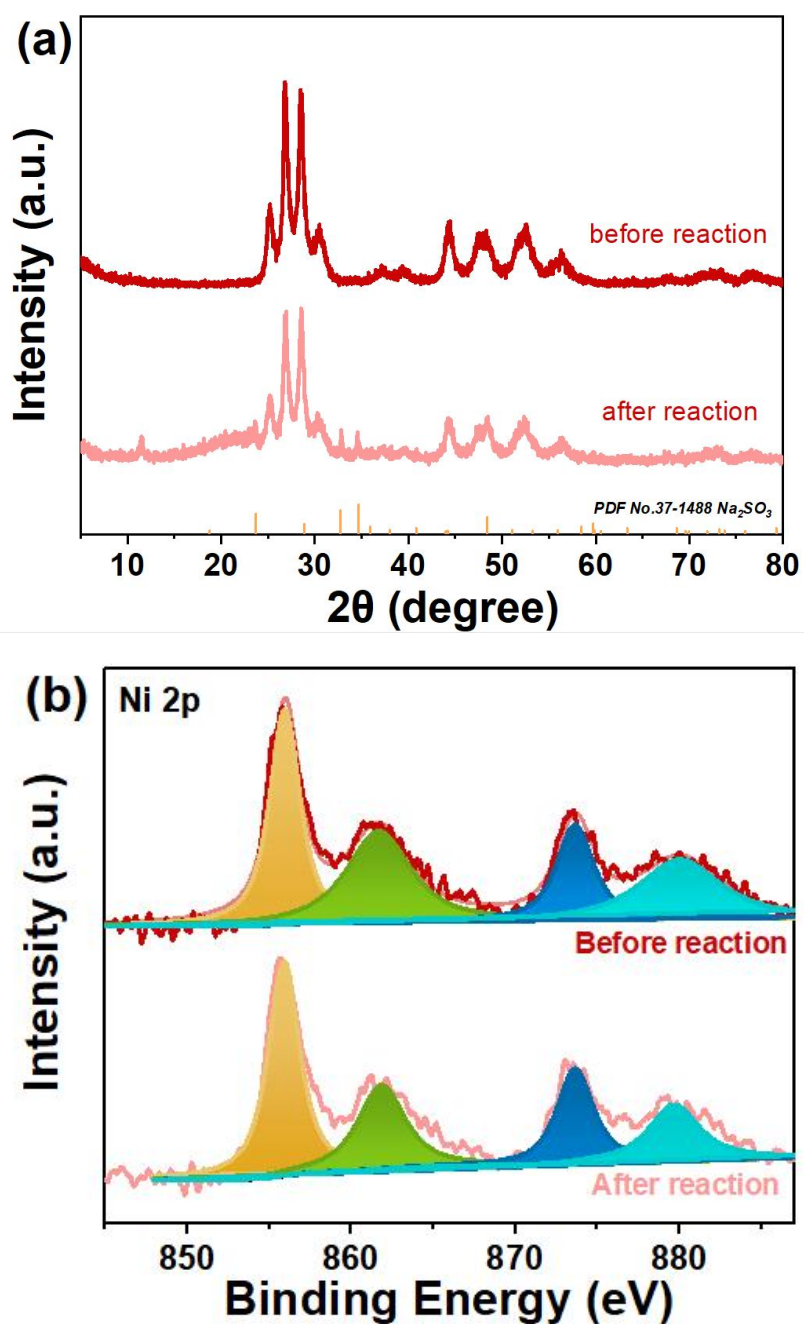

**Figure S3.** XRD patterns(a) and high-resolution XPS spectra (b) of Ni 2p for CZNS 6 before and after the photocatalytic hydrogen evolution reaction.

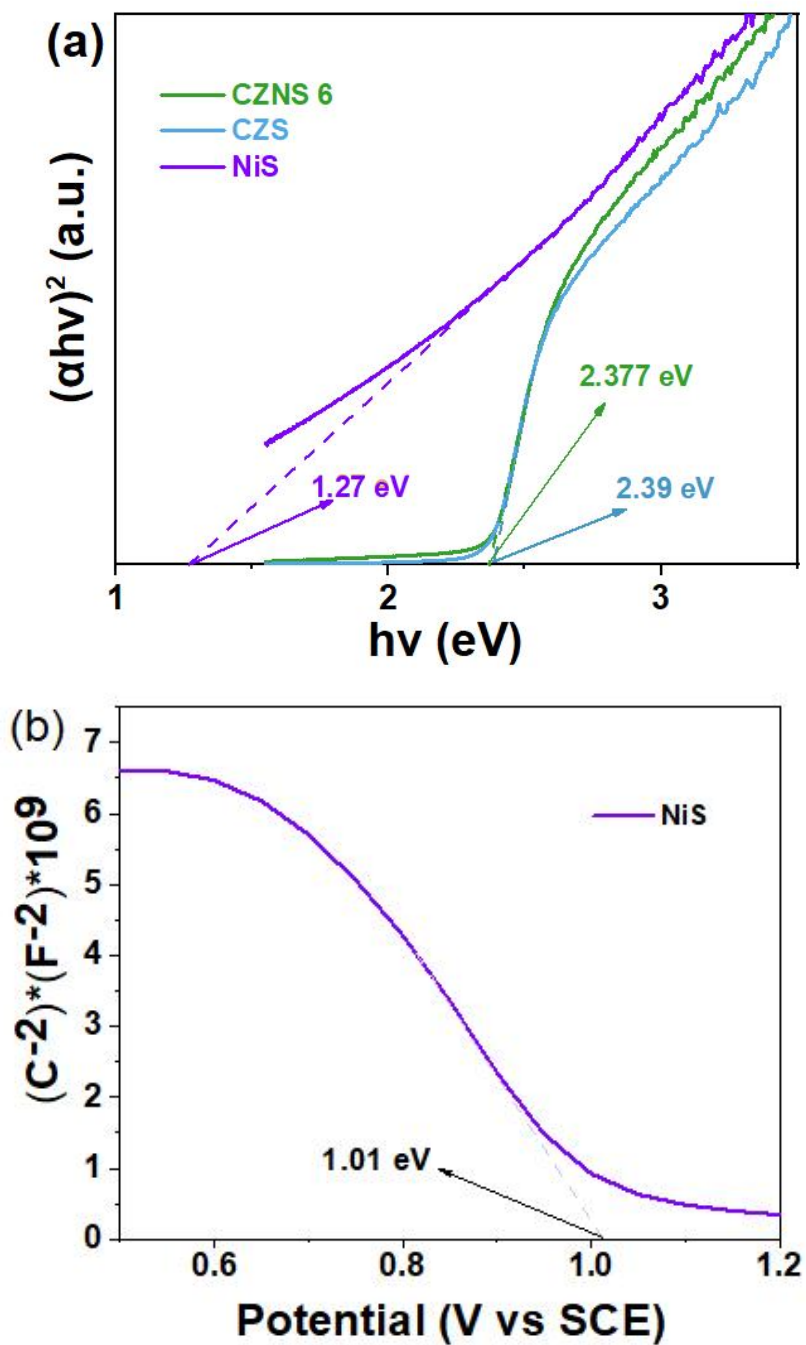

**Figure S4.** The Tauc plots of NiS, CZS and CZNS 6(a); the Mott-Schottky plots of NiS (b).

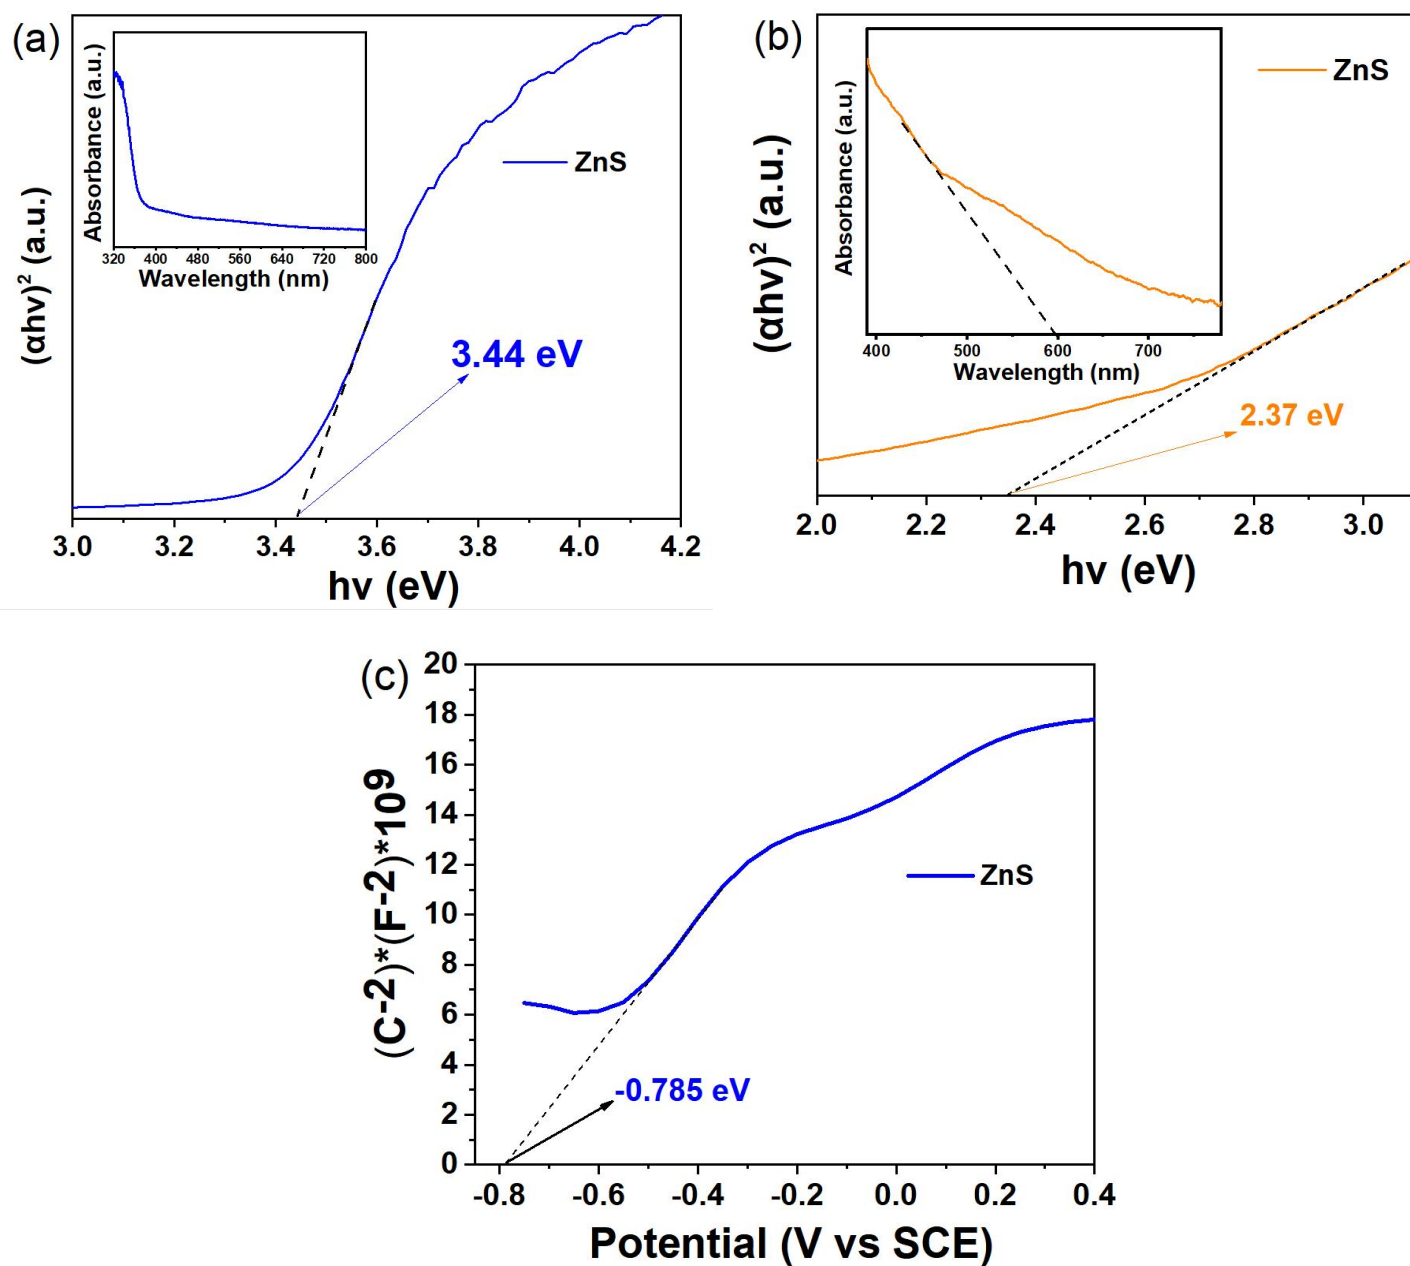

**Figure S5.** The Tauc plots of  $(\alpha h\nu)^2$  versus  $h\nu$  of ZnS (a) and enlarged view for ZnS at visible region local (b); the Mott-Schottky plots of ZnS (c).

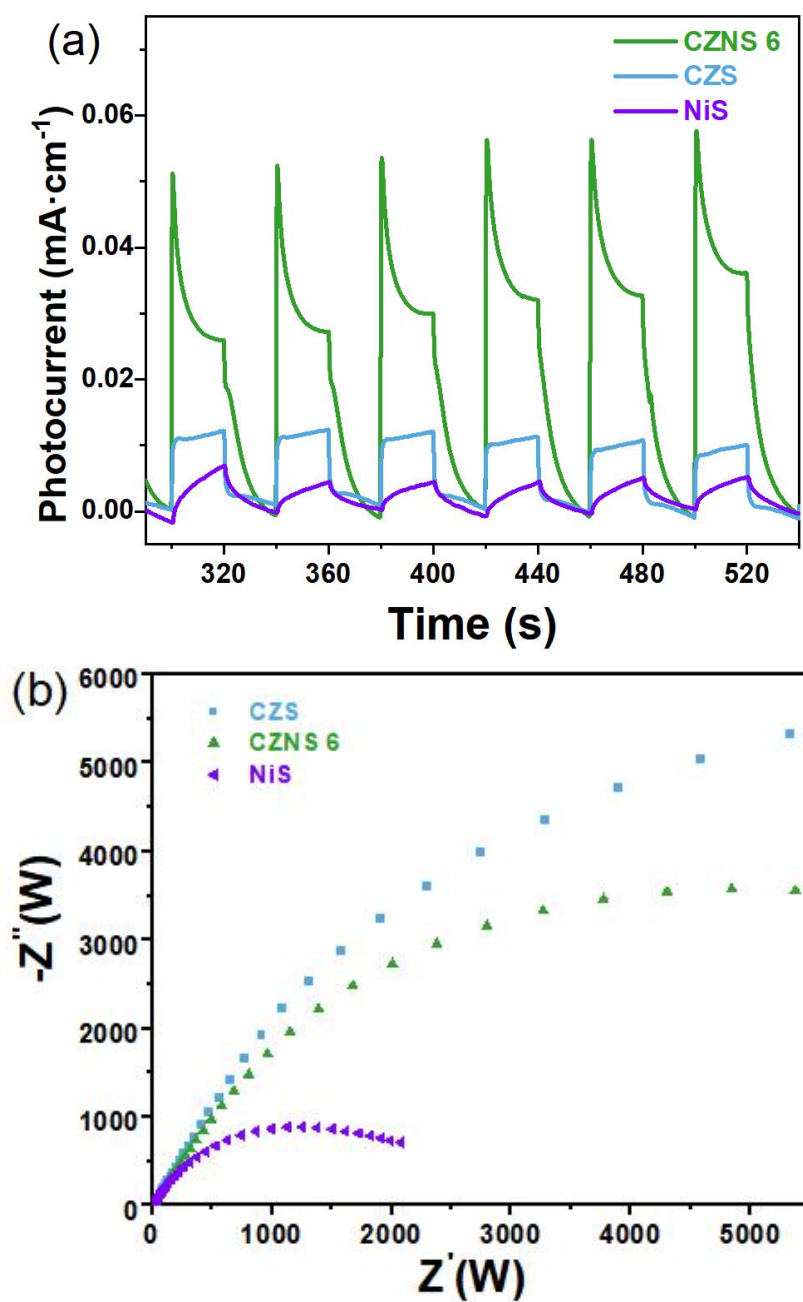

**Figure S6.** The photo-current curves (a) and Electrochemical Impedance Spectroscopy (EIS) (b) of CZS, NiS, and CZNS 6.



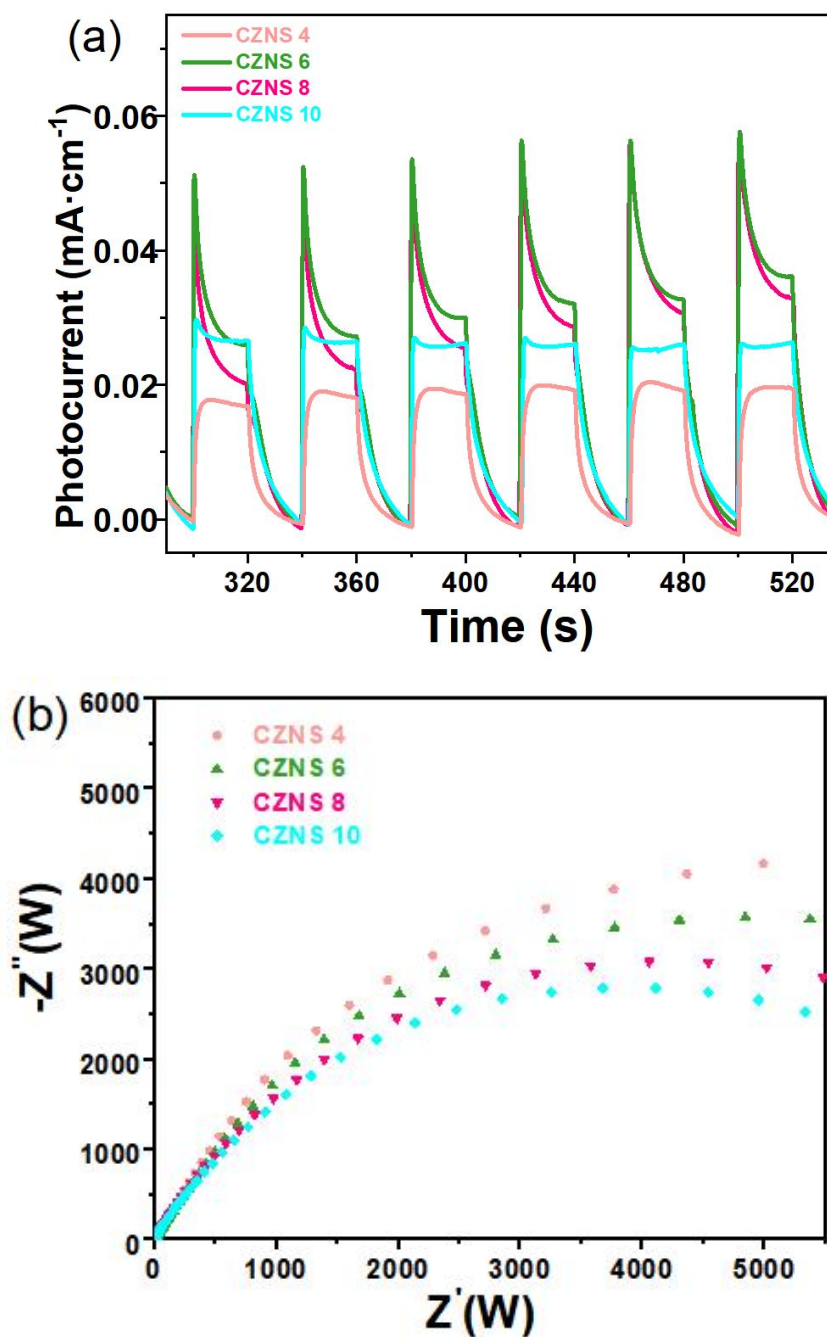

**Figure S7.** The photo-current curves(a) and Electrochemical Impedance Spectroscopy (EIS) (b) of samples with different NiS additions.

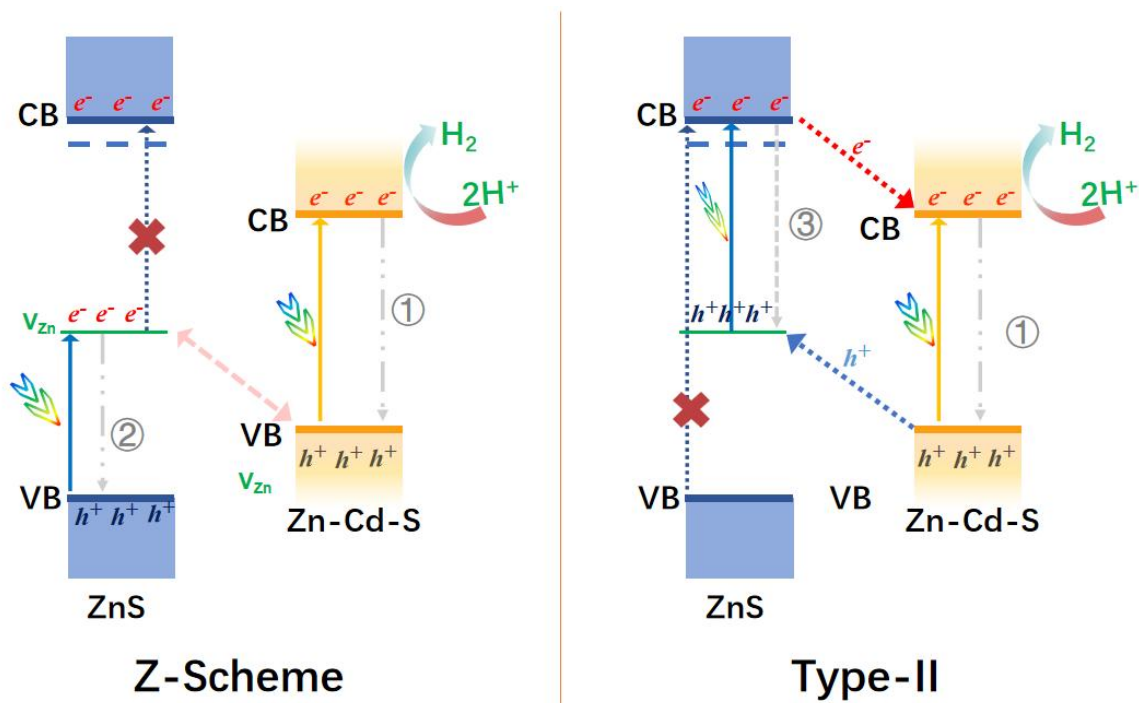

**Figure S8.** The band structure and charge transfer mechanism of sample CZS under visible light ( $> 420$  nm): (a) Z-Scheme; (b) type-II.

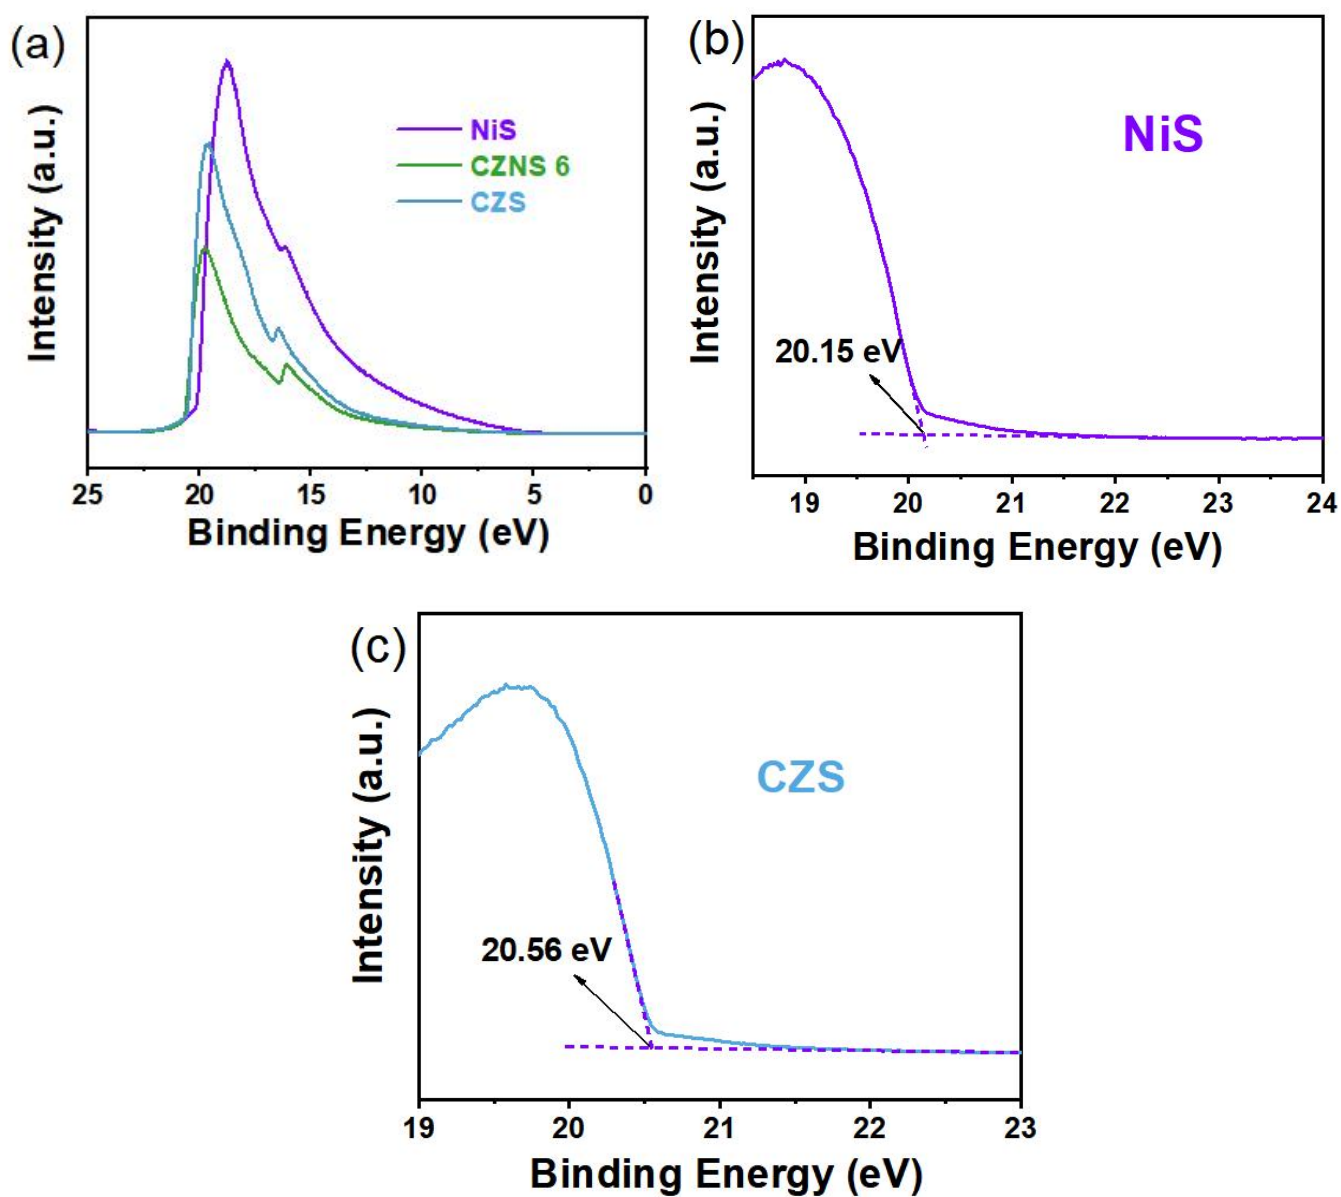

**Figure S9.** The UPS spectra of NiS, CZS and CZNS 6 (a), and the corresponding photoemission cutoff spectra of NiS (b) and CZS (c).

## SUPPORTING INFORMATION

---

**Table S1.** The time-resolved photoluminescence of sample CZN and CZNS 6.

| Samples         | CZS   | CZNS 6 |
|-----------------|-------|--------|
| A <sub>1</sub>  | 1.35  | 1.75   |
| $\tau_1^a$ (ns) | 2.45  | 0.38   |
| A <sub>2</sub>  | 1.28  | 0.38   |
| $\tau_2^b$ (ns) | 9.46  | 49.05  |
| A <sub>3</sub>  | 0.31  |        |
| $\tau_3^c$ (ns) | 85.66 |        |
| Ave $\tau$ (ns) | 57.1  | 47.4   |

## SUPPORTING INFORMATION

**Table S2.** Recent heterojunction photocatalytic systems for H<sub>2</sub> evolution based on the Zn-Cd-S nanomaterials.

| Catalyst                                      | Weight (mg) | Sacrificial agent                                     | Light source            | H <sub>2</sub> evolution (mmol·g <sup>-1</sup> ·h <sup>-1</sup> ) | Reference |
|-----------------------------------------------|-------------|-------------------------------------------------------|-------------------------|-------------------------------------------------------------------|-----------|
| Cd <sub>0.5</sub> Zn <sub>0.5</sub> S nanorod | 100         | Na <sub>2</sub> S and Na <sub>2</sub> SO <sub>3</sub> | 300 W Xe lamp           | 2.58                                                              | 1         |
| ZnCdS/ZnCdS/ZnS                               | 20          | Na <sub>2</sub> S and Na <sub>2</sub> SO <sub>3</sub> | 300 W Xe lamp           | 0.2339                                                            | 2         |
| Pt-modified ZnCdS                             | 25          | Na <sub>2</sub> S and Na <sub>2</sub> SO <sub>3</sub> | 300 W Xe lamp           | 1.045                                                             | 3         |
| NiO/ZnCdS                                     | 40          | Na <sub>2</sub> S and Na <sub>2</sub> SO <sub>3</sub> | 300 W Xe lamp           | 5.042                                                             | 4         |
| Pt-modified ZnCdS                             | 10          | Na <sub>2</sub> S and Na <sub>2</sub> SO <sub>3</sub> | 300 W Xe lamp           | 8.87                                                              | 5         |
| Zn <sub>(1-x)</sub> Cd <sub>x</sub> S         | 20          | Na <sub>2</sub> S and Na <sub>2</sub> SO <sub>3</sub> | 300 W Xe lamp (>420 nm) | 7.71                                                              | 6         |
| ZnS/g-C <sub>3</sub> N <sub>4</sub>           | 50          | Na <sub>2</sub> S and Na <sub>2</sub> SO <sub>3</sub> | 300 W Xe lamp           | 0.713                                                             | 7         |
| ZnCdS QDs                                     | 50          | Na <sub>2</sub> S and Na <sub>2</sub> SO <sub>3</sub> | 300 W Xe lamp           | 11.32                                                             | 8         |
| ZnO/CdS                                       | 30          | Na <sub>2</sub> S and Na <sub>2</sub> SO <sub>3</sub> | 300 W Xe lamp           | 7.669                                                             | 9         |
| Zn <sub>1-x</sub> Cd <sub>x</sub> S/CdS       | 10          | Na <sub>2</sub> S and Na <sub>2</sub> SO <sub>3</sub> | 300 W Xe lamp           | 2.7                                                               | 10        |
| ZnS/g-C <sub>3</sub> N <sub>4</sub>           | 30          | Na <sub>2</sub> S and Na <sub>2</sub> SO <sub>3</sub> | 300 W Xe lamp           | 0.654                                                             | 11        |
| This work                                     | 30          | Na <sub>2</sub> S and Na <sub>2</sub> SO <sub>3</sub> | 300 W Xe lamp (>420 nm) | 16.68                                                             | /         |

### References

- [1] M. Liu, D. Jing, Z. Zhou, L. Guo, Twin-induced one-dimensional homojunctions yield high quantum efficiency for solar hydrogen generation, *Nature Communication*, **2013**, *4*, 2278.

## SUPPORTING INFORMATION

---

- [2] Kochev, Y. Kabachii, A. Kostrov, F. Gostev, I. Shelaev, A. Abyusu, A. Vasin, A. Titov, J. Kiwi, Fast kinetic laser spectroscopy of the exciton dynamics during photocatalytic ZnCdS/ZnCdS/ZnS QDs mediated hydrogen production, *Applied Physics A*, **2023**, *129*, 155.
- [3] Z. Wang, L. Wang, B. Cheng, H. Yu, J. Yu, Photocatalytic H<sub>2</sub> Evolution Coupled with Furfuralcohol Oxidation over Pt-Modified ZnCdS Solid Solution, *Small Methods*, **2021**, *5*, 2100979.
- [4] G. He, Y. Liu, R. Gao, Y. Gan, W. Zhao, D. Liang, T. Fujita, D. Zeng, Construction of a unique 2D/0D NiO/ZnCdS p-n hetero junction photocatalyst with highly improved photocatalytic H<sub>2</sub> generation capacity, *New Journal of Chemistry*, **2023**, *47*, 10995-11000.
- [5] H. Li, S. Tao, S. Wan, G. Qiu, Q. Long, J. Yu, S. Gao, S-scheme heterojunction of ZnCdS nanospheres and dibenzothiophene modified graphite carbon nitride for enhanced H<sub>2</sub> production, *Chines Journal of Catalysis*, **2023**, *6*, 19631.
- [6] S. Du, L. Chen, C. Men, H. Ji, T. Su, Z. Qin, Effect of surface defect states on Zn<sub>(1-x)</sub>Cd<sub>x</sub>S for enhanced photocatalytic hydrogen evolution, *Journal of Alloys and Compounds*, **2023**, *955*, 170265.
- [7] X. Hao, J. Zhou, Z. Cui, Y. Wang, Y. Wang, Z. Zou, Zn-vacancy mediated electron-hole separation in ZnS/g-C<sub>3</sub>N<sub>4</sub> heterojunction for efficient visible-light photocatalytic hydrogen production, *Applied Catalysis B: Environmental*, **2018**, *229*, 41-51.
- [8] W. Fan, H. Chang, J. Zhong, J. Lu, G. Ma, H. Zhang, Z. Jiang, G. Yin, Facile synthesis of ZnCdS quantum dots via a novel photoetching MOF strategy for boosting photocatalytic hydrogen evolution, *Separation and Purification Technology*, **2024**, *330*, 125258.
- [9] H. Lu, Y. Liu, S. Zhang, J. Wan, X. Wang, L. Deng, J. Kan, G. Wu, Clustered tubular S-scheme ZnO/CdS heterojunctions for enhanced photocatalytic hydrogen production. *Materials Science and Engineering: B*, **2023**, *289*, 116282.
- [10] T. Bai, X. Shi, M. Liu, H. Huang, M. Yu, J. Zhang, X. Bu, A metal-organic framework-derived Zn<sub>1-x</sub>Cd<sub>x</sub>S/CdS heterojunction for efficient visible light-driven photocatalytic hydrogen production. *Dalton Transactions*, **2021**, *50*, 6064-6070.
- [11] S. Tian, H. Ren, Z. Liu, Z. Miao, L. Tian, J. Li, Y. Liu, S. Wei, P. Wang, ZnS/g-C<sub>3</sub>N<sub>4</sub> heterojunction with Zn-vacancy for efficient hydrogen evolution in water splitting driven by visible light, *Catalysis Communications*, **2022**, *164*, 106422.
